# Supplementary material for: Thiosulfate-mediated seeded growth of Au@AuAg yolk–shell nanocubes with surface concavity: optical and catalytic properties
Source: Royal Society of Chemistry journal article supplement (doi:10.1039/d3ce00717k), 2023-01-01
Supplement: d3ce00717k1.pdf [file d3ce00717k1.pdf]

Supporting Information

# Thiosulfate-Mediated Seeded Growth of Au@AuAg Yolk-Shell Nanocubes with Surface Concavity: Optical and Catalytic Properties

Yuanyuan Min,<sup>a</sup> Xiaoyu Li,<sup>a</sup> Yingying Wang,<sup>b\*</sup> Yan Zhao,<sup>c</sup> Feng Liu,<sup>d</sup> Maochang Liu,<sup>d</sup> and Yiqun Zheng<sup>a\*</sup>

<sup>a</sup> School of Chemistry, Chemical Engineering, and Materials, Jining University, Qufu, Shandong 273155, P. R. China

<sup>b</sup> Health Management Department, Shandong Vocational College of Light Industry, Zibo 255300, China

<sup>c</sup> College of Chemistry and Chemical Engineering, Qufu Normal University, Qufu, Shandong 273165, P. R. China

<sup>d</sup> International Research Center for Renewable Energy, National Key Laboratory of Multiphase Flow in Power Engineering, Xi'an Jiaotong University, Xi'an, Shaanxi 710049, China

\* Corresponding authors: Prof. Dr. Y. Zheng, E-mail: [whzyq@163.com](mailto:whzyq@163.com); Prof. Y. Wang, E-mail: [hxwyy2005@mail.sdu.edu.cn](mailto:hxwyy2005@mail.sdu.edu.cn)

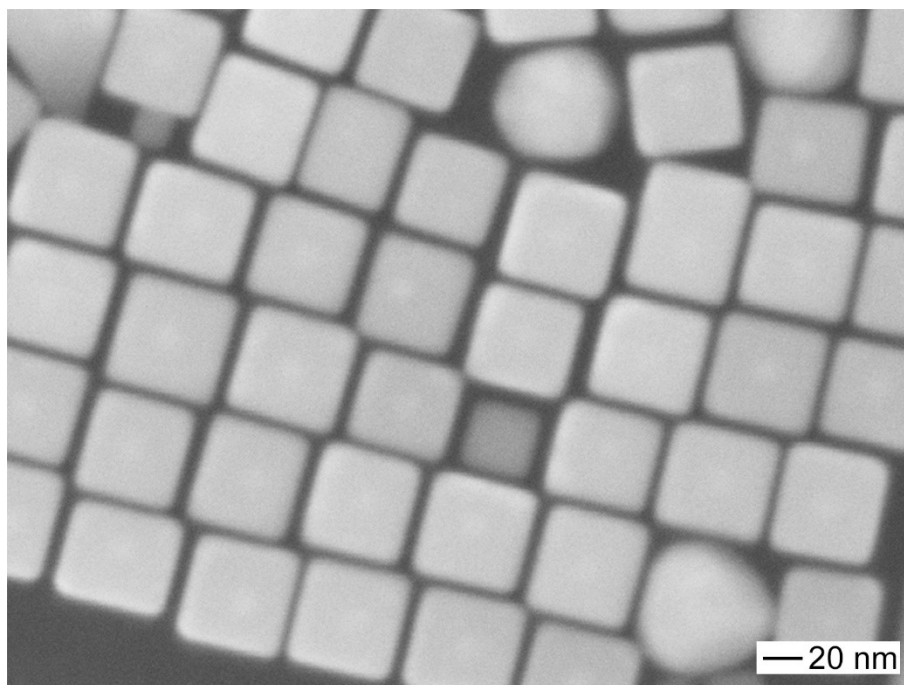

**Figure S1.** SEM image of Au@Ag core-shell nanocubes.

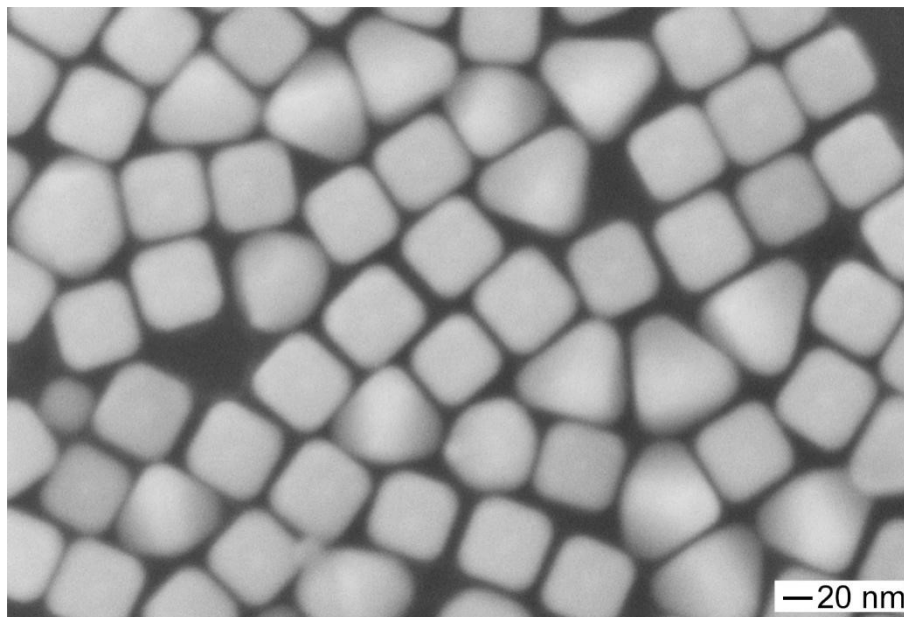

**Figure S2.** SEM image of products obtained by treating Au@Ag core-shell nanocubes with  $\text{Na}_2\text{S}_2\text{O}_3$  (25 pmol).

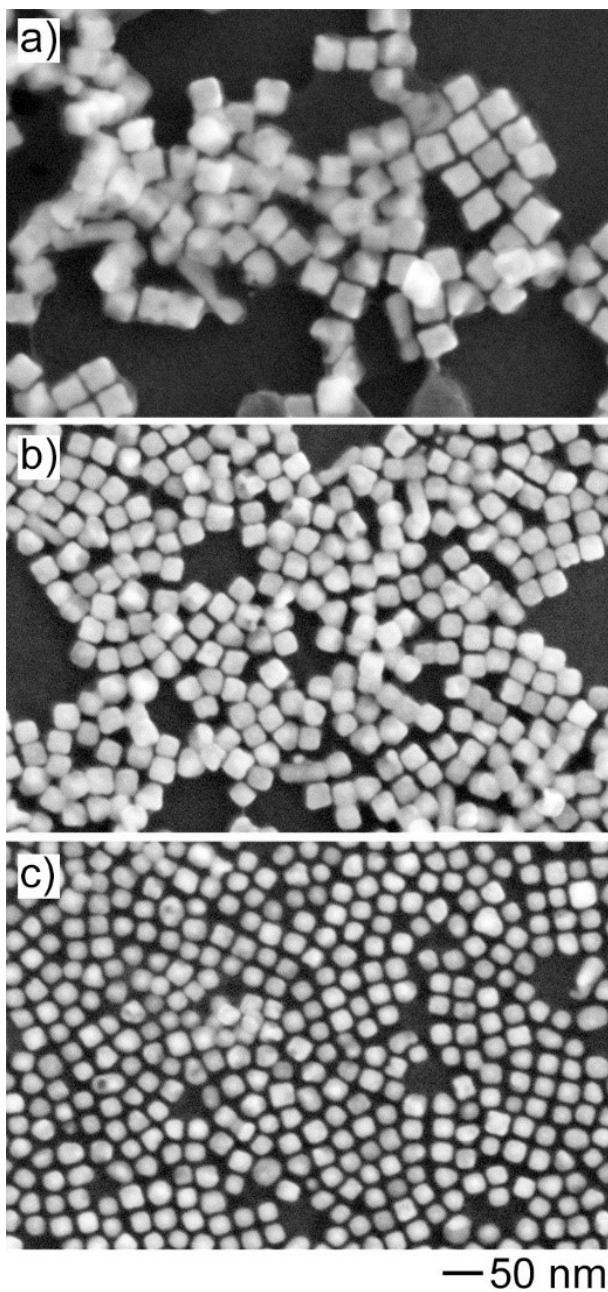

**Figure S3.** Effect of seed amount. SEM images of products obtained *via* the standard procedure, except that the volume of 10-nm Au seed stock solution was tuned to be a) 20  $\mu\text{L}$ , b) 50  $\mu\text{L}$ , and c) 100  $\mu\text{L}$ , respectively.

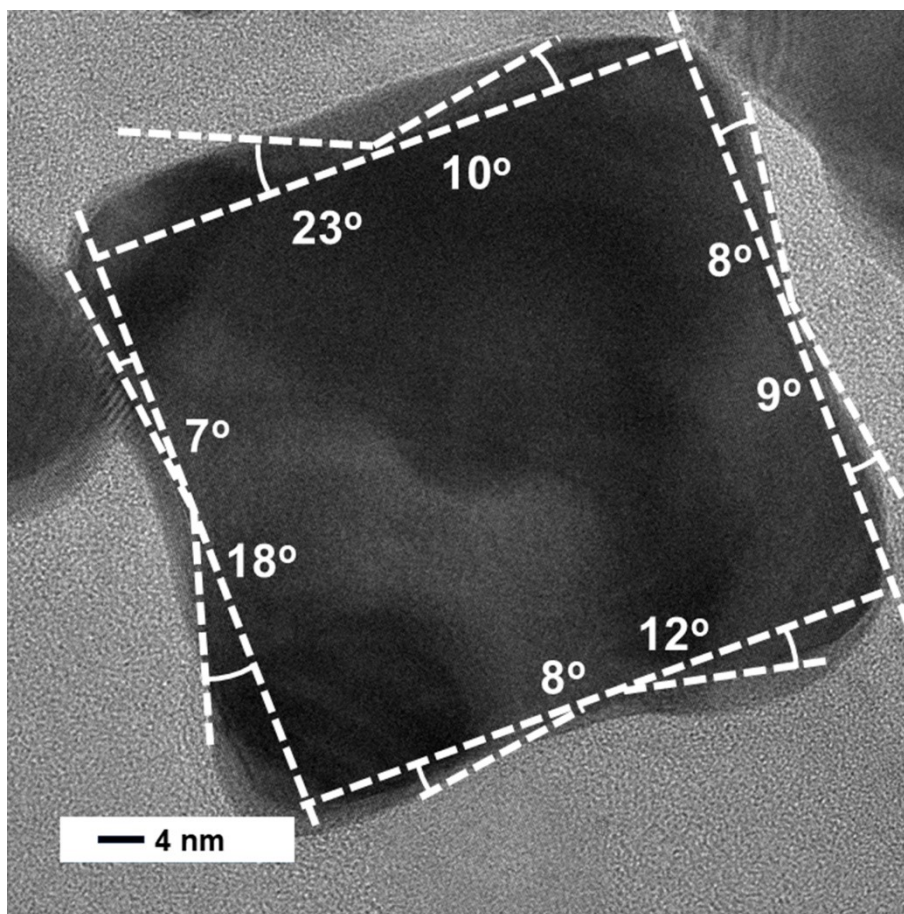

**Figure S4.** TEM image of an individual Au@AuAg YSCNC. The dash lines dictate the curved surface with the projection angle labeled.

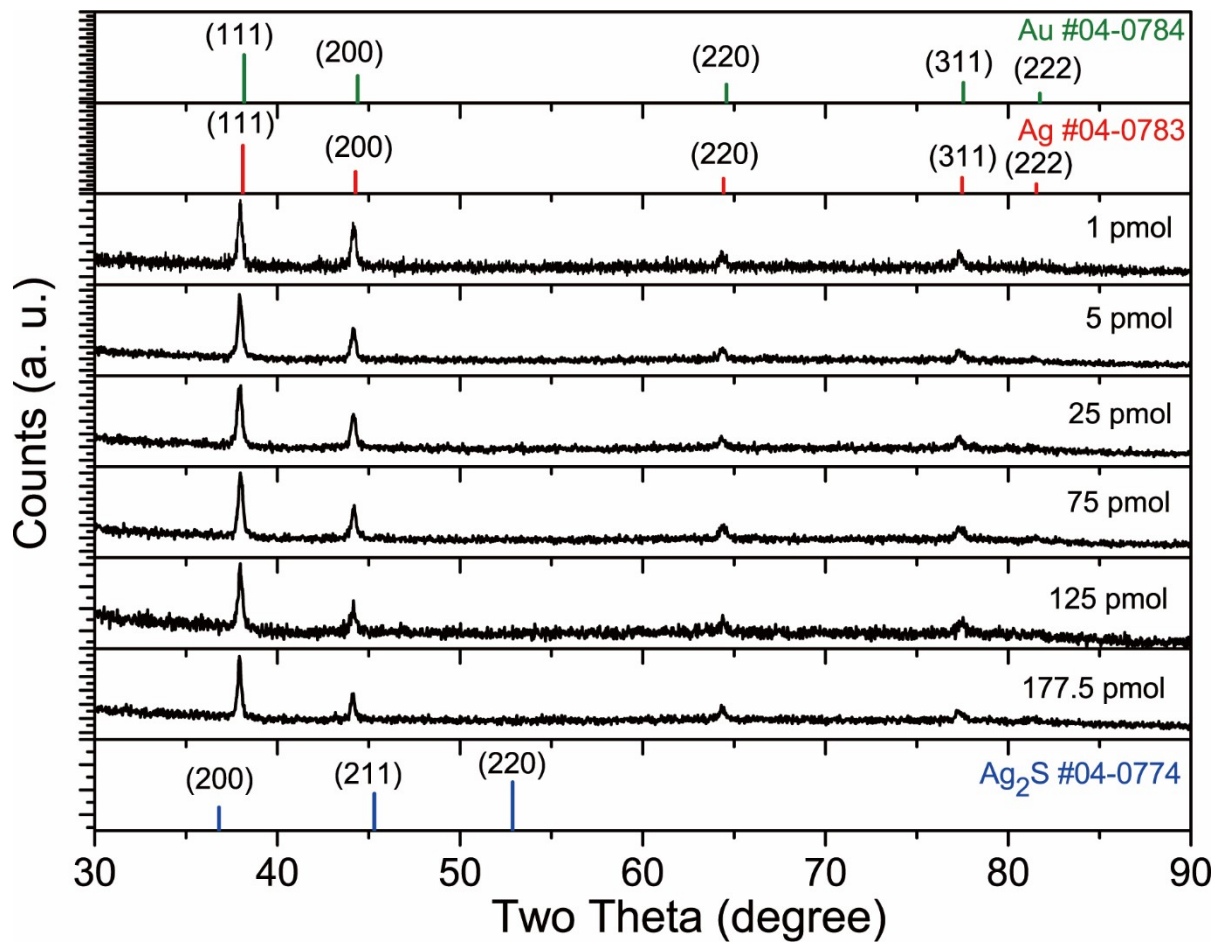

**Figure S5.** XRD pattern of the products obtained *via* the standard procedure, except that no H<sub>2</sub>AuCl<sub>4</sub> was added and the amount of Na<sub>2</sub>S<sub>2</sub>O<sub>3</sub> was varied.

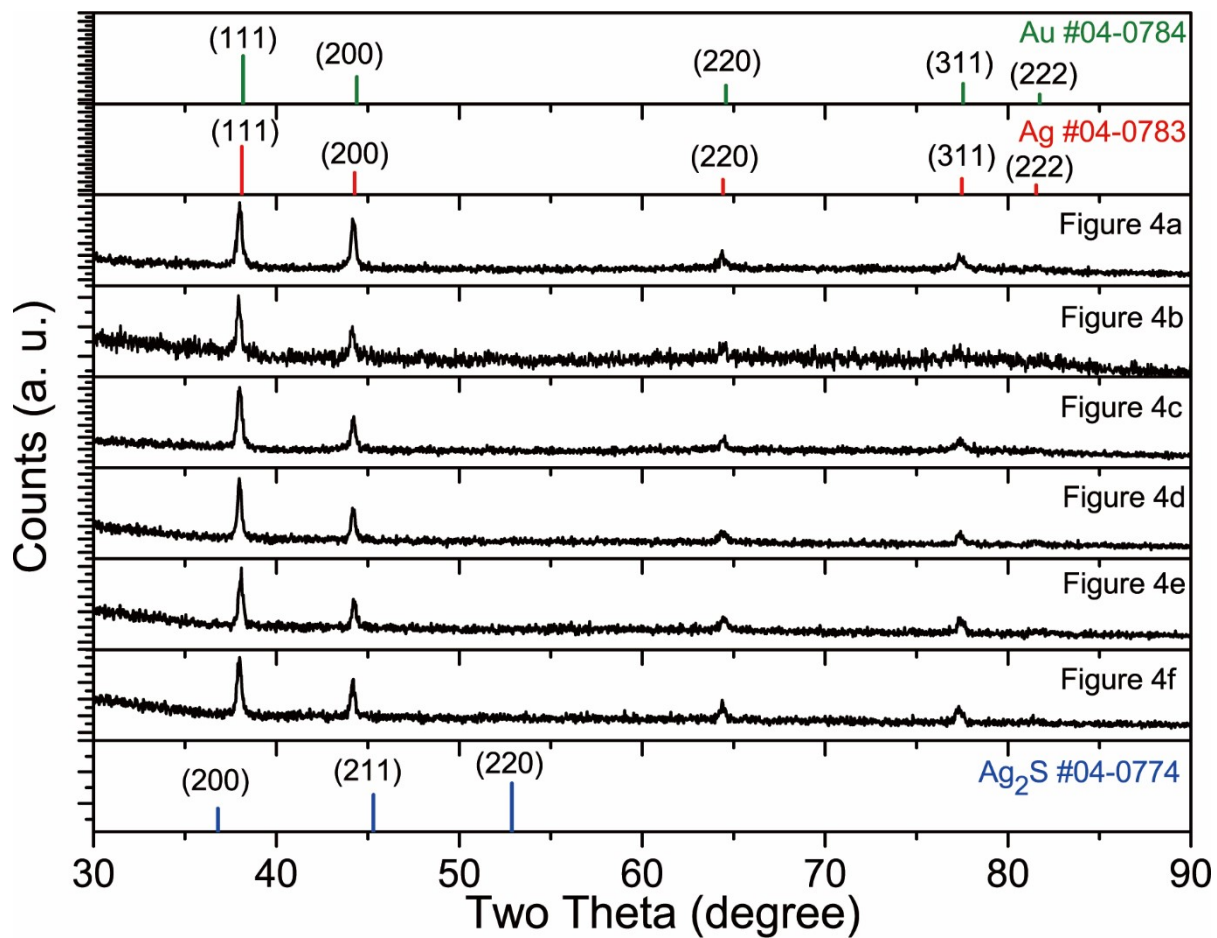

Figure S6. XRD patterns of the products shown in Figure 4.

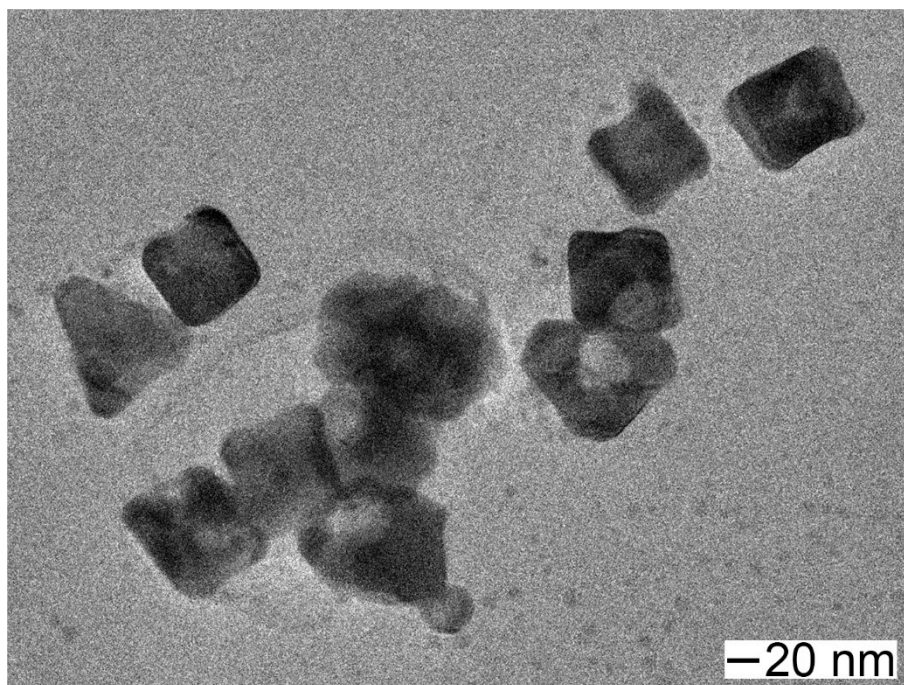

**Figure S7.** TEM image of Au@AuAg YSCNCs catalysts after the catalytic measurement.



**Table S1.** Summary of the relationship between projection angle and facet index.

| <b>Projection angle (°)</b> | <b>Facet index ({hkl})</b> |
|-----------------------------|----------------------------|
| 23.2                        | 730                        |
| 12.5                        | 920                        |
| 16.0                        | 720                        |
| 20.6                        | 830                        |

**Table S2.** Summary of binding energy peaks in XPS spectra.

| <b>Orbital</b> | <b>Sample</b> | <b>Binding Energy Peak (eV)</b> |        |
|----------------|---------------|---------------------------------|--------|
| Au 4f          | Figure 4a     | 87.21                           | 83.55  |
|                | Figure 4b     | 87.37                           | 83.68  |
|                | Figure 4c     | 87.40                           | 83.74  |
|                | Figure 4d     | 87.31                           | 83.66  |
|                | Figure 4e     | 87.28                           | 83.61  |
|                | Figure 4f     | 87.37                           | 83.70  |
| Ag 3d          | Figure 4a     | 373.61                          | 367.64 |
|                | Figure 4b     | 373.67                          | 367.69 |
|                | Figure 4c     | 373.64                          | 367.67 |
|                | Figure 4d     | 373.73                          | 367.71 |
|                | Figure 4e     | 373.60                          | 367.60 |
|                | Figure 4f     | 373.64                          | 367.73 |
| S 2p           | Figure 4a     | /                               | /      |
|                | Figure 4b     | /                               | /      |
|                | Figure 4c     | 161.53                          | 160.43 |
|                | Figure 4d     | 161.62                          | 160.51 |
|                | Figure 4e     | 161.76                          | 160.60 |
|                | Figure 4f     | 161.75                          | 160.62 |
